# Supplementary material for: Fish Red Blood Cells Modulate Immune Genes in Response to Bacterial Inclusion Bodies Made of TNFα and a G-VHSV Fragment
Source: Front Immunol. 2019 May 22;10:1055. doi: 10.3389/fimmu.2019.01055 (PMC6538768; doi:10.3389/fimmu.2019.01055)
Supplement: Supplementary file 1 [file Table_1.XLSX]

## Sheet: Table S1
Table S1: Immune-gene expression analysis of RBCs from rainbow trout injected intravenously with PBS, IBiRFP, IBTNFα, and IBfrg16G-VHSV at 24 and 48h post-injection. Rainbow trout of 15-20 g were injected with 5.5mg/kg of IB intravenously. Blood was extracted and RBCs Ficoll-purified 24 and 48 h post-injection. Gene expression was analysed by RT-qPCR, 2-ΔCt method, with endogenous gene eukaryotic…
	24 h								48 h
	PBS		IBiRFP		IBTNFa		IBfrg16G-VHSV		PBS		IBiRFP		IBTNFa		IBfrg16G-VHSV
	Mean	SD	Mean	SD	Mean	SD	Mean	SD	Mean	SD	Mean	SD	Mean	SD	Mean	SD
tlr3	3.67e-05	4.76e-05	0.000369	0.000255	0.000182	6.23e-05	0.000246	4.56e-05	8.22e-05	3.28e-05	0.000174	0.000186	0.000141	7.07e-05	0.000403	0.000275
tlr9	4.49e-07	1.06e-07	3.48e-06	4.23e-06	1.14e-06	8.1e-07	5.41e-06	5.45e-06	5.28e-07	1.73e-07	5.73e-05	7.28e-05	1.43e-06	9.54e-07	0.000216	0.00027
ifn1	6.52e-07	5.42e-07	1.45e-05	9.49e-06	1.63e-05	4.43e-06	2.57e-05	1.51e-05	3.2e-06	8.27e-07	9.6e-05	0.00011	1.26e-05	1.28e-05	0.000228	0.000268
mx	0.000104	5.52e-05	0.00352	0.00173	0.00287	0.00073	0.00199	0.000557	0.000669	0.000324	0.00145	0.00125	0.00221	0.000935	0.00256	0.0011
tnfa	3.79e-09	1.46e-09	5.1e-07	5.07e-07	3.18e-07	1.65e-07	9.68e-07	5.34e-07	9.76e-09	6.59e-09	1.03e-06	1.25e-06	4.09e-07	6.77e-07	7.64e-07	9.03e-07
il1b	7.82e-08	5.27e-08	7.95e-06	1.1e-05	5.36e-06	4.24e-06	2.12e-05	1.65e-05	4.37e-08	3.63e-08	5.77e-05	6.65e-05	4.3e-06	3.91e-06	0.000104	0.000109
il8	2e-07	2.44e-07	9.23e-07	8.68e-07	2.19e-06	1.19e-06	2e-06	1.5e-06	3.9e-08	3.88e-08	3.02e-06	4.19e-06	1.06e-06	1.29e-06	3.51e-06	3.13e-06
il12b	1.53e-07	8.95e-08	3.1e-06	5.23e-06	1.44e-06	1.28e-06	9.02e-06	8.84e-06	1.41e-07	2.43e-07	5.99e-05	7.13e-05	3.78e-06	4.28e-06	0.000248	0.000283
il15	2.17e-05	7.81e-06	6.54e-05	2.11e-05	5.08e-05	2.02e-05	4.92e-05	1.75e-05	3.94e-05	7.55e-06	4.98e-05	1.79e-05	4.38e-05	1.68e-05	3.79e-05	8.76e-06
il2	1.96e-08	1.49e-08	3.31e-06	5.94e-06	5.8e-07	5.74e-07	2.03e-05	2.56e-05	4.72e-08	2.11e-08	3.92e-05	4.48e-05	2.79e-06	5e-06	0.000205	0.000383
il6	6.6e-08	8.37e-08	4.22e-08	4.9e-08	9.25e-08	6.5e-08	1.43e-07	1.1e-07	5.28e-09	3.35e-09	1.66e-07	2.16e-07	1.48e-07	2.03e-07	1.57e-06	1.61e-06
cd83	9.54e-05	4.11e-05	0.0011	0.000185	0.000677	0.000192	0.000886	0.000229	0.000197	7.88e-05	0.00059	0.000468	0.000595	0.000241	0.00124	0.000681
mhcI	0.00835	0.0029	0.0229	0.00764	0.0257	0.0056	0.0237	0.00671	0.0108	0.00452	0.0219	0.0191	0.0249	0.00907	0.0256	0.00697
mhcII	1.32e-05	8.92e-06	9.36e-05	7.67e-05	0.000157	6.15e-05	0.000124	7.46e-05	1.66e-05	6.35e-06	0.000126	4.7e-05	4.84e-05	2.71e-05	0.000253	0.000129
nkef	5.95e-06	2.34e-06	4.07e-05	4.18e-05	6.18e-05	1.19e-05	8.87e-05	4.21e-05	8.15e-06	1.3e-06	0.000517	0.000621	5.19e-05	3.81e-05	0.000938	0.000963
gstp1	6.39e-05	1.5e-05	0.000112	5.63e-05	0.000129	3.24e-05	0.000165	3.38e-05	0.000128	4.58e-05	0.000462	0.000534	0.000157	7.49e-05	0.000806	0.000708
hepcidin	9.44e-06	2.02e-06	3.92e-05	5.28e-05	7.68e-06	3.25e-06	6.42e-05	6.14e-05	4.69e-06	2.47e-06	4.29e-07	2.58e-07	6.49e-07	2.8e-07	5.59e-07	2.31e-07
trx	0.00115	0.000288	0.00217	0.000259	0.00206	0.000476	0.00216	0.00048	0.00089	0.000209	0.00277	0.00168	0.00242	0.00055	0.00274	0.000787
